# Supplementary material for: Comparative Metabolomics Reveals Key Pathways Associated With the Synergistic Killing of Colistin and Sulbactam Combination Against Multidrug-Resistant Acinetobacter baumannii
Source: PubMed Central journal article supplement (PMC6620532; doi:10.3389/fphar.2019.00754), 2019-07-04
Supplement: Presentation_1.pdf [file Presentation_1.pdf]

## Supporting Information

### Comparative metabolomics reveals key pathways associated with the synergistic killing of colistin and sulbactam combination against multidrug-resistant *Acinetobacter baumannii*

Mei-Ling Han<sup>1,2,#</sup>, Xiaofen Liu<sup>2,#</sup>, Tony Velkov<sup>3</sup>, Yu-Wei Lin<sup>1</sup>, Yan Zhu<sup>1</sup>, Darren J. Creek<sup>4</sup>, Christopher K. Barlow<sup>5</sup>, Heidi H. Yu<sup>1</sup>, Zhihui Zhou<sup>6</sup>, Jing Zhang<sup>2,\*</sup>, Jian Li<sup>1,2,\*</sup>

<sup>1</sup>Biomedicine Discovery Institute, Infection and Immunity Program, Department of Microbiology, Monash University, Clayton, Victoria 3800, Australia.

<sup>2</sup>Institute of Antibiotics, Huashan Hospital, Fudan University, Shanghai 200040, China.

<sup>3</sup>Department of Pharmacology & Therapeutics, School of Biomedical Sciences, Faculty of Medicine, Dentistry and Health Sciences, The University of Melbourne, Parkville, Victoria 3010, Australia

<sup>4</sup>Drug Delivery, Disposition and Dynamics, Monash Institute of Pharmaceutical Sciences, Monash University, 381 Royal Parade, Parkville, Victoria 3052, Australia.

<sup>5</sup>Department of Biochemistry and Molecular Biology, Monash University, Clayton, Victoria 3800, Australia.

<sup>6</sup>Department of Infectious Diseases, Sir Run Run Shaw Hospital, Zhejiang University School of Medicine, Hangzhou, China.

#Contributed equally to this work.

\*To whom correspondence should be addressed to: [jian.li@monash.edu](mailto:jian.li@monash.edu) or [zhangj\\_fudan@aliyun.com](mailto:zhangj_fudan@aliyun.com)

**Running title:** Colistin and sulbactam against *Acinetobacter baumannii*

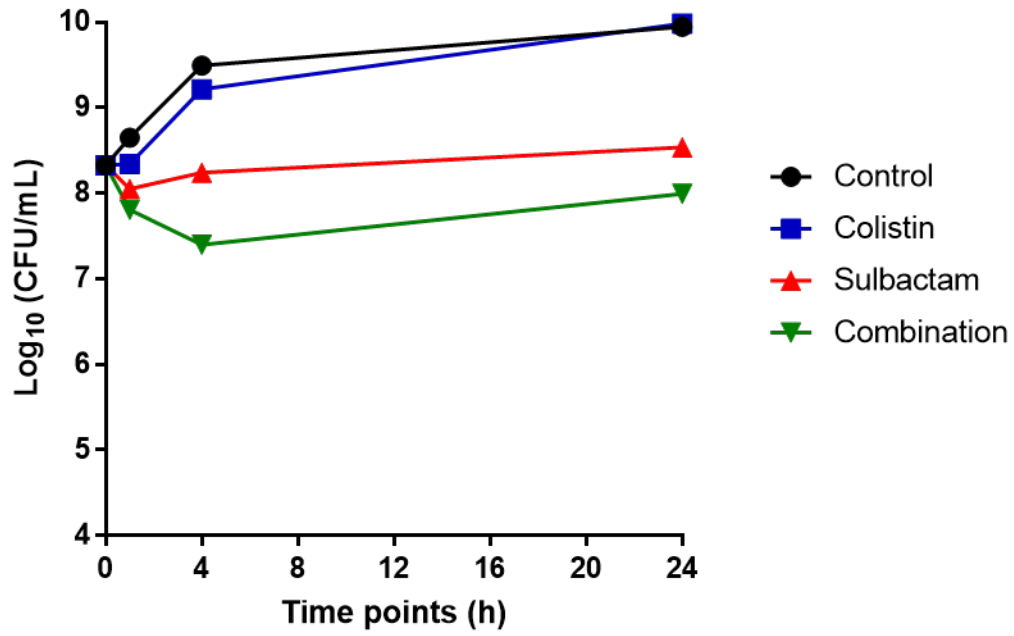

**Figure S1.** Time-kill kinetics of colistin alone, sulbactam alone and the combination against *A. baumannii* 090342 at 1, 4, and 24 h. The concentrations of colistin and sulbactam were 1 mg/L ( $2 \times \text{MIC}$ ) and 128 mg/L ( $1 \times \text{MIC}$ ), respectively.

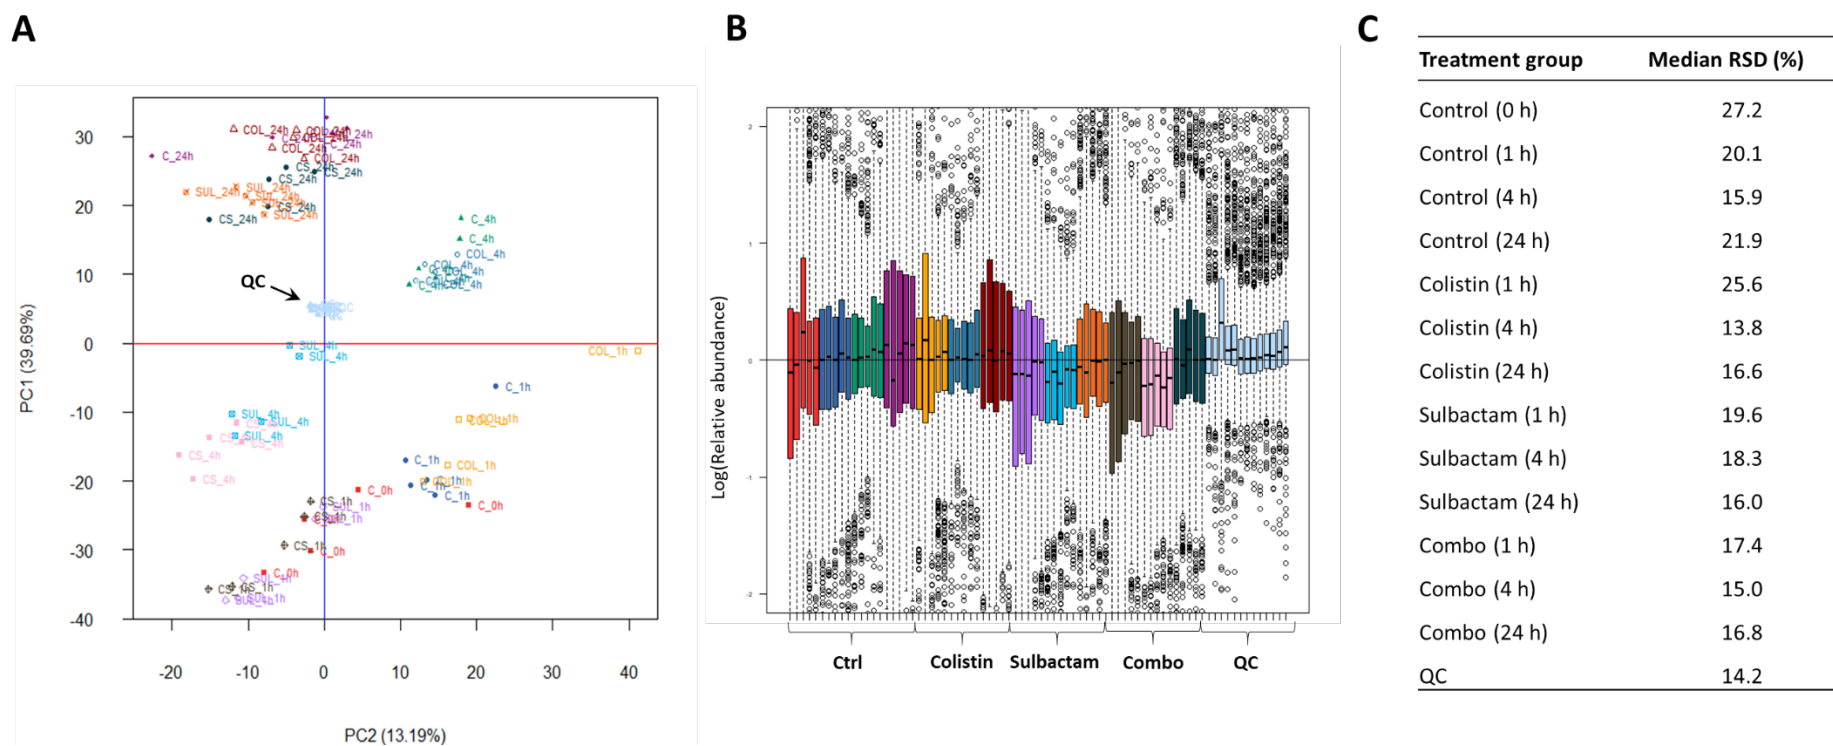

**Figure S2.** (A) PCA score plot for intracellular metabolites of *A. baumannii* AB090342 and QC samples; (B) Log-transformed relative abundance; and (C) Data precision represented as the median relative standard deviation (RSD) for all metabolites based on all replicates of each group. Four quality controls (QCs) were analyzed within the same LC-MS batch with all the samples. Each dataset represents five biological replicates.

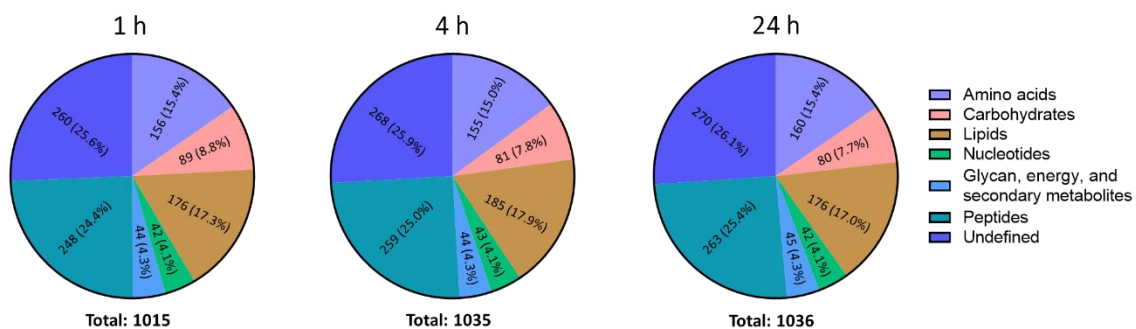

**Figure S3.** Total number of putative metabolites in each metabolic pathway in *A. baumannii* AB090342 at 1, 4, and 24 h. Metabolomics samples were analyzed using the HILIC method and all detected metabolites were putatively identified and quantified in IDEOM.

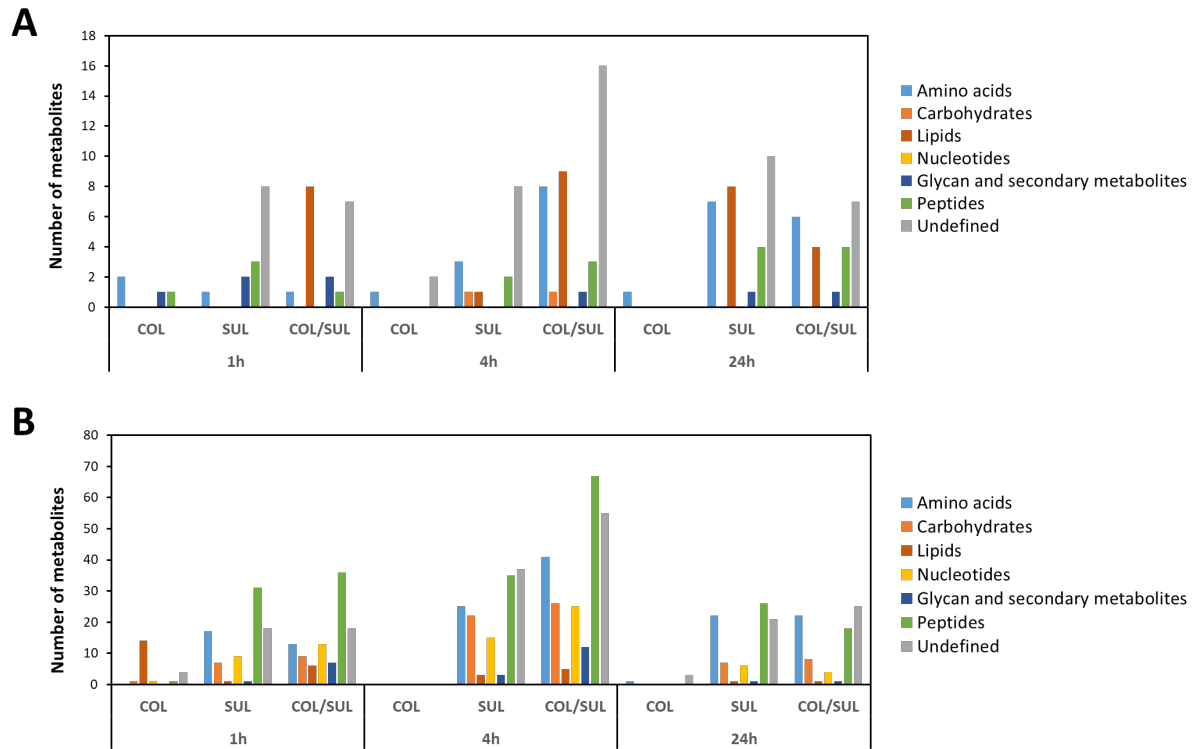

**Figure S4.** Numbers of significantly **(A)** increased and **(B)** decreased metabolites in major metabolic pathways in *A. baumannii* AB090342 due to treatments with colistin alone (COL), sulbactam alone (SUL) and the combination (COL/SUL) at 1, 4, and 24 h (FDR < 0.05 and  $\log_2$  (fold change)  $\geq 1$  or  $\leq -1$ , one-way ANOVA).

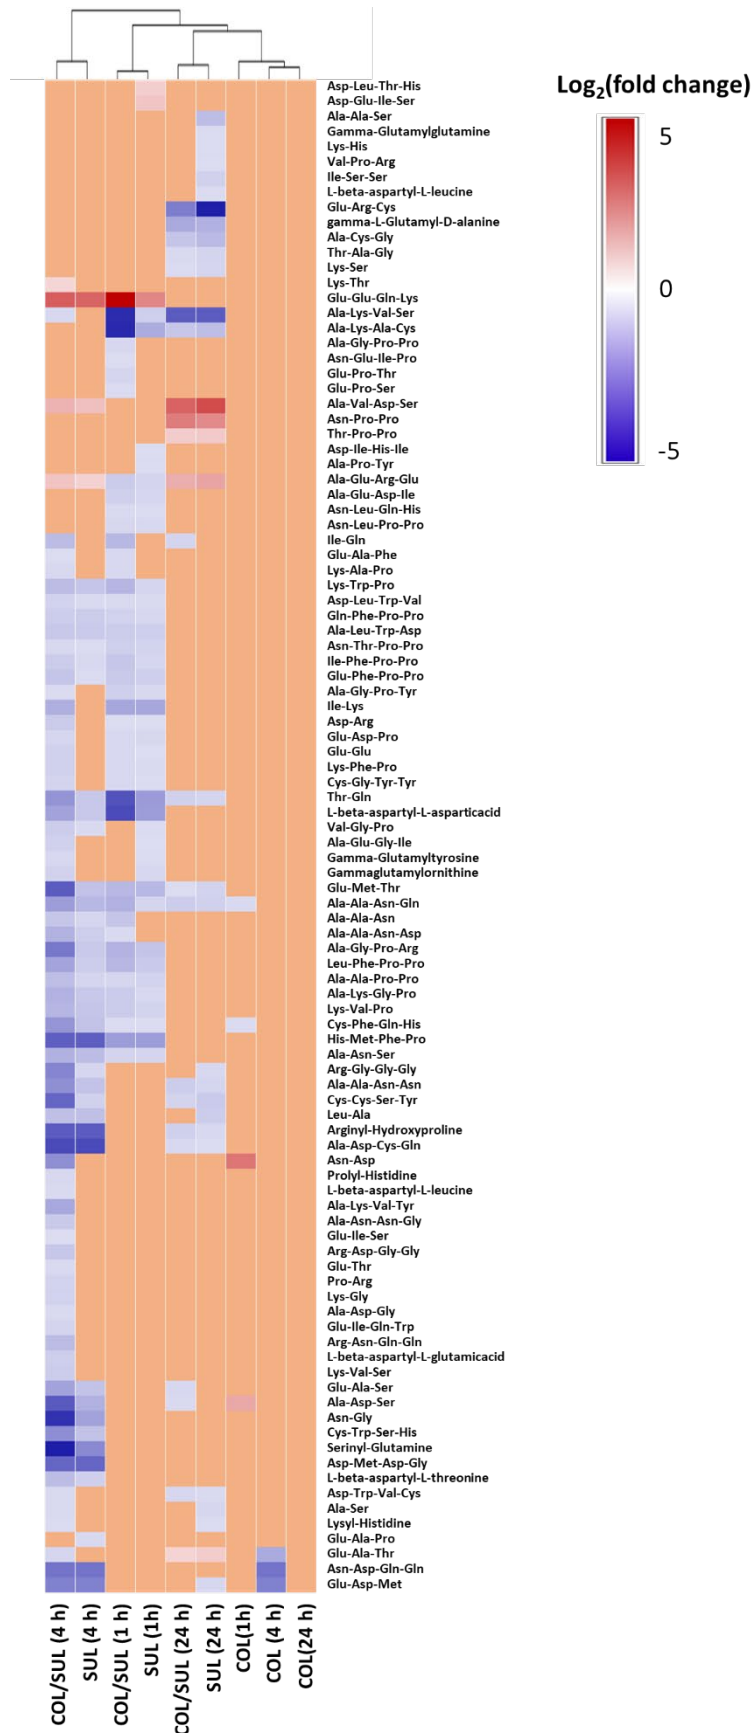

**Figure S5.** Clustered heatmap profiles of the relative abundance for significantly affected peptides in *A. baumannii* AB090342 by all three treatments (colistin alone [COL], sulbactam alone [SUL] and the combination [COL/SUL]) at 1, 4, and 24 h, compared to the untreated control samples. Blue = significantly decreased ( $\log_2 \text{FC} \leq -1$ ), red = significantly increased ( $\log_2 \text{FC} \geq 1$ ), and orange = not significant.

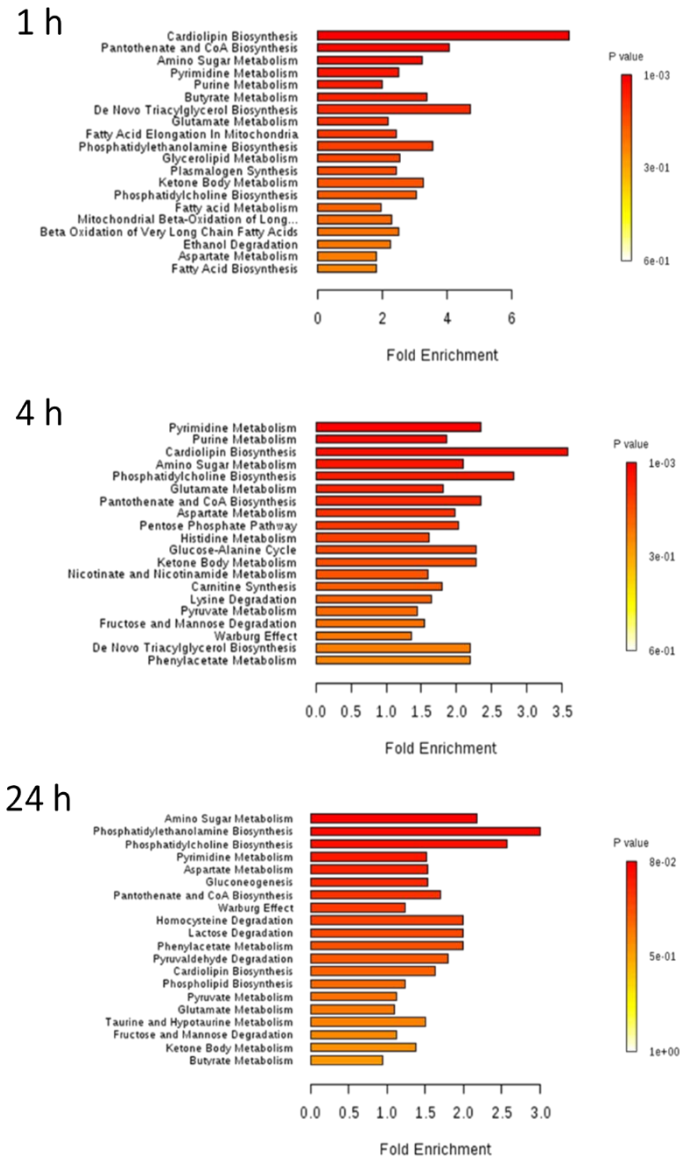

**Figure S6.** Pathway-associated metabolite enrichment analysis (top 20 most abundant metabolites) in *A. baumannii* AB090342 in response to colistin alone, sulbactam alone and the combination at (A) 1 h, (B) 4 h and (C) 24 h (FDR < 0.05, and  $|\log_2 FC| \geq 1$ , one-way ANOVA).



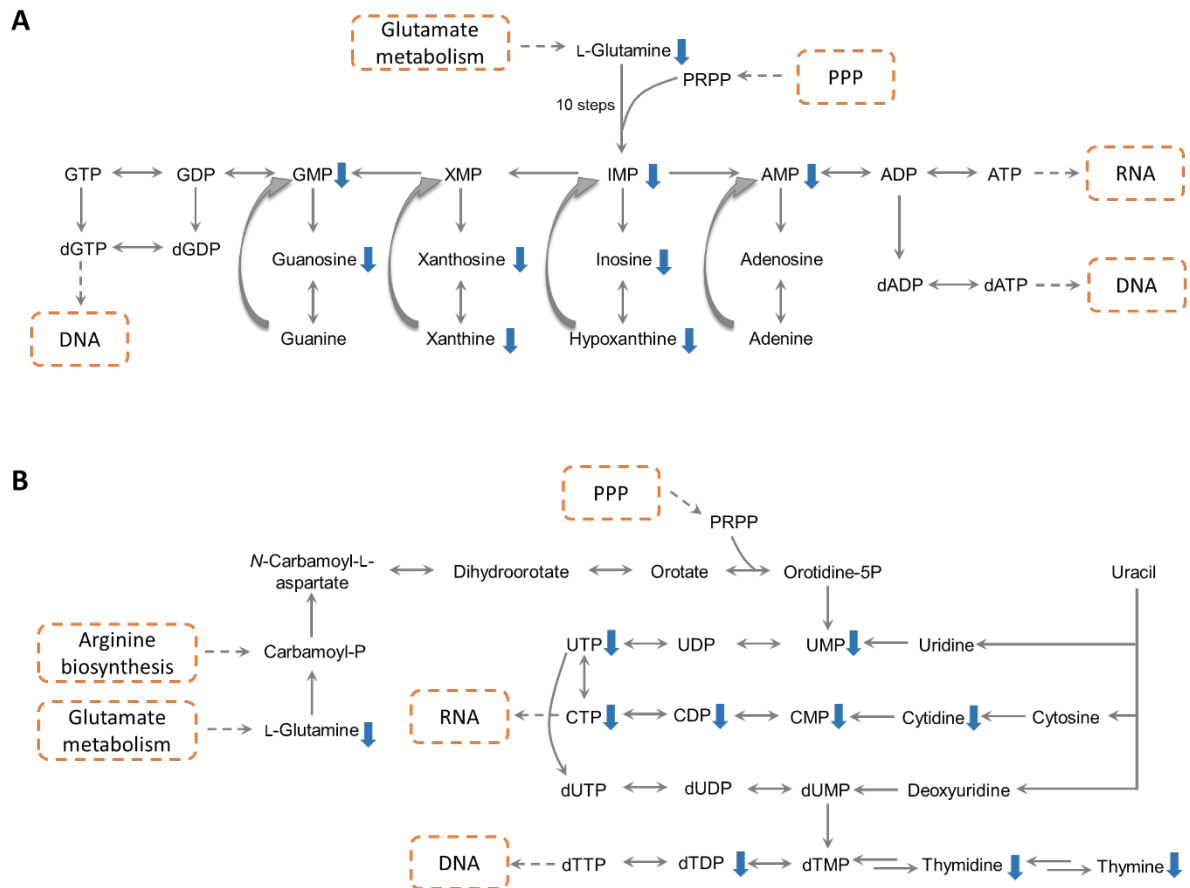

**Figure S7.** Sulbactam alone and the combination decreased most metabolite levels in **(A)** purine and **(B)** pyrimidine metabolism in *A. baumannii* AB090342 at 4 h. Metabolomics data were collected from five biological replicates per condition. Blue arrows indicate significantly decreased nucleotide metabolites (FDR < 0.05,  $\log_2$  FC  $\leq$  -1, one-way ANOVA).

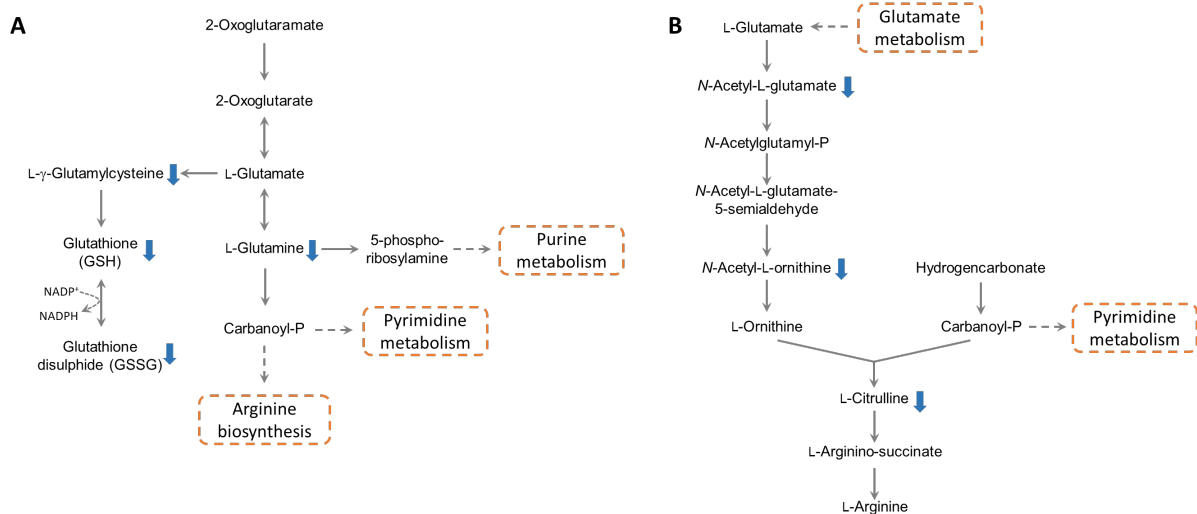

**Figure S8.** Sulbactam alone and the combination decreased metabolite levels in **(A)** glutamate metabolism and **(B)** arginine biosynthesis in *A. baumannii* AB090342 at 4 h. Blue arrows indicate significantly decreased metabolites. FDR < 0.05 and  $\log_2 \text{FC} \leq -1$  (one-way ANOVA).

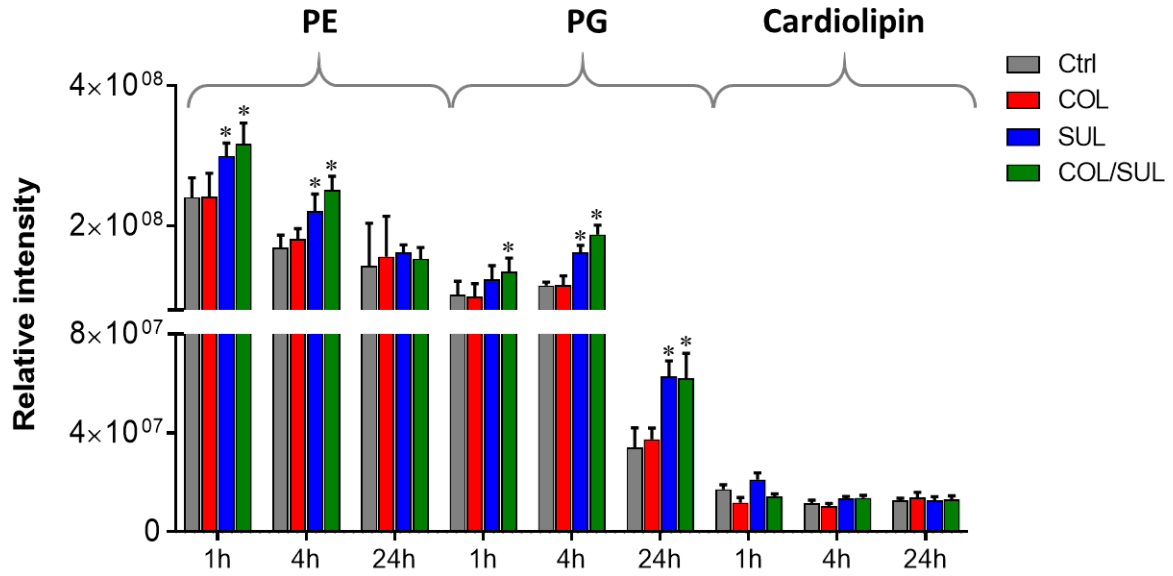

**Figure S9.** Relative intensities of total PE, PG and cardiolipin in *A. baumannii* AB090342 following treatments with colistin alone (COL), sulbactam alone (SUL) and the combination (COL/SUL) at 1, 4, and 24 h. Five biological replicates were employed and data were collected from HILIC chromatography and ESI-MS method. Asterisks represent statistical analysis between each treated group and the untreated control ( $*p < 0.05$ , student's *t* test).
